# Supplementary material for: A fluorescence polarization immunoassay for detection of thiacloprid in environmental and agricultural samples
Source: Royal Society of Chemistry journal article supplement (doi:10.1039/c9ra04776j), 2019-01-01
Supplement: c9ra04776j1.pdf [file c9ra04776j1.pdf]

**Table S1** Average  $IC_{50}$  and  $mP_{max}/IC_{50}$  values of FPIA in BB solutions containing different concentrations of NaCl ( $n = 3$ )

| Ionic strength (M) | $mP_{max}$ | $IC_{50}$ (ng mL <sup>-1</sup> ) | $mP_{max}/IC_{50}$ |
|--------------------|------------|----------------------------------|--------------------|
| 0.1                | 105        | 18.74                            | 5.60               |
| 0.2                | 99.3       | 21.52                            | 4.61               |
| 0.4                | 104        | 24.65                            | 4.22               |
| 0.6                | 103        | 30.37                            | 3.39               |
| 0.8                | 106        | 23.03                            | 4.60               |
| 1.0                | 108        | 22.86                            | 4.72               |

**Table S2** Average  $IC_{50}$  and  $mP_{max}/IC_{50}$  values of FPIA in BB solutions with various pH ( $n = 3$ )

| pH  | $mP_{max}$ | $IC_{50}$ (ng mL <sup>-1</sup> ) | $mP_{max}/IC_{50}$ |
|-----|------------|----------------------------------|--------------------|
| 4.4 | 650        | 151.20                           | 4.30               |
| 5.4 | 208        | 16.93                            | 12.29              |
| 6.4 | 98.7       | 38.46                            | 2.57               |
| 7.4 | 106        | 19.21                            | 5.52               |
| 8.4 | 102        | 29.07                            | 3.51               |
| 9.4 | 104        | 22.55                            | 4.61               |

**Table S3** Average  $IC_{50}$  and  $mP_{max}/IC_{50}$  values of FPIA in BB solutions containing different concentrations of methanol ( $n = 3$ )

| Concentrations of methanol | $mP_{max}$ | $IC_{50}$ (ng mL <sup>-1</sup> ) | $mP_{max}/IC_{50}$ |
|----------------------------|------------|----------------------------------|--------------------|
| 0%                         | 196        | 18.26                            | 10.73              |
| 5%                         | 202        | 16.13                            | 12.52              |
| 10%                        | 189        | 23.87                            | 7.92               |
| 20%                        | 137        | 27.04                            | 5.07               |
| 30%                        | 168        | 19.80                            | 8.48               |



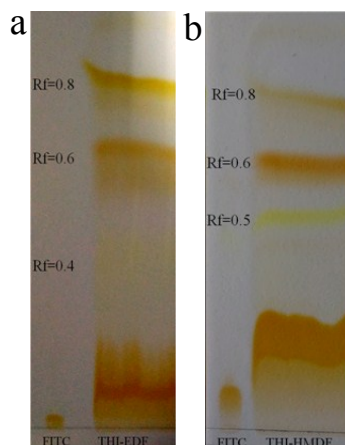

**Fig. S2** The purification results of fluorescent tracer-labeled haptens using TLC. (a) THI-EDF, (b) THI-HMDF.

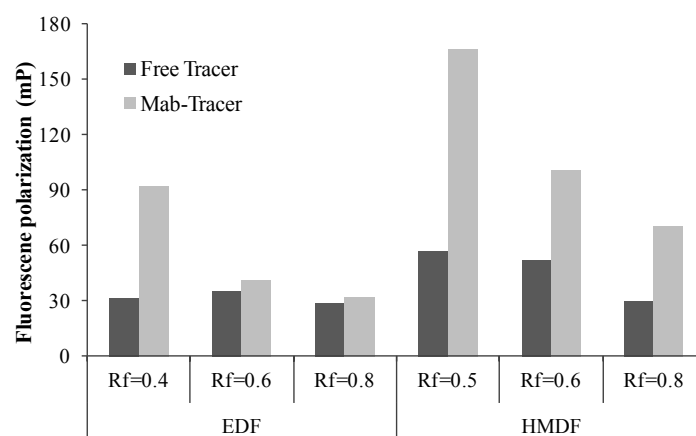

**Fig. S3** The characterization of the compounds in three bands of EDF and HMDF. One hundred milliliter compounds (100-fold dilution) that was extracted from different bands reacted with 100  $\mu\text{L}$  mAb C9 ( $300 \mu\text{g mL}^{-1}$ ) for 20 min in black microtiter plate respectively. The value of FP was measured by SpectraMax M5 with the 492 nm for excitation wavelength and 526 nm for emission wavelength.

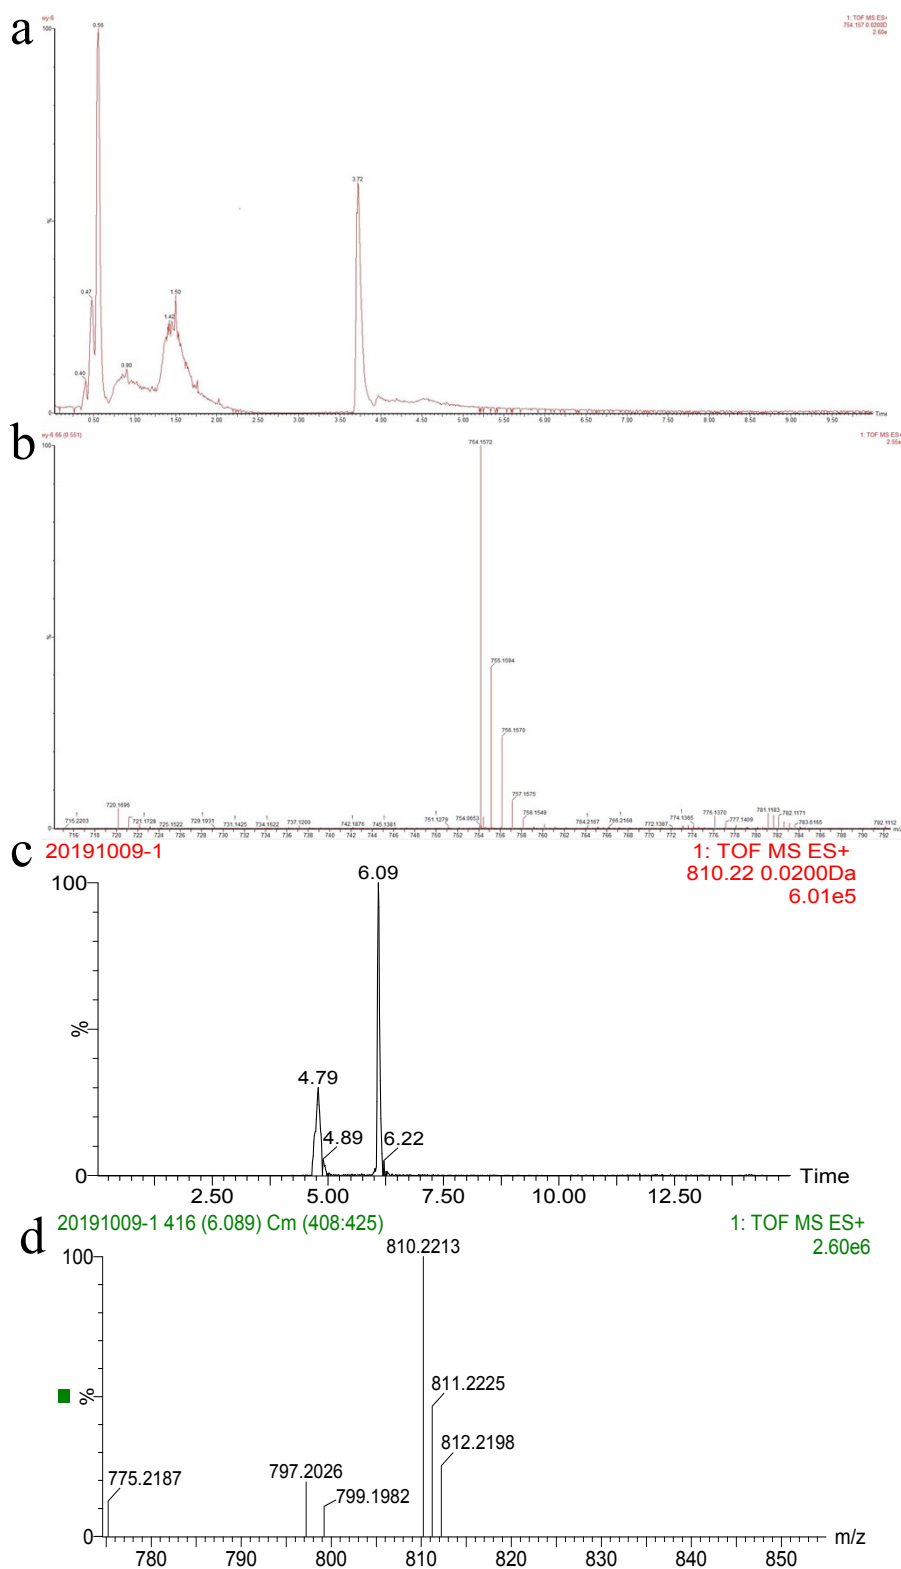

**Fig. S4** The mass spectrometry for THI-EDF and THI-HMDF. Ion current (a) and analysis for  $m/z=754.1576$  (b) for THI-EDF; ion current (c) and analysis for  $m/z=810.2202$  (d) for THI-HMDF.

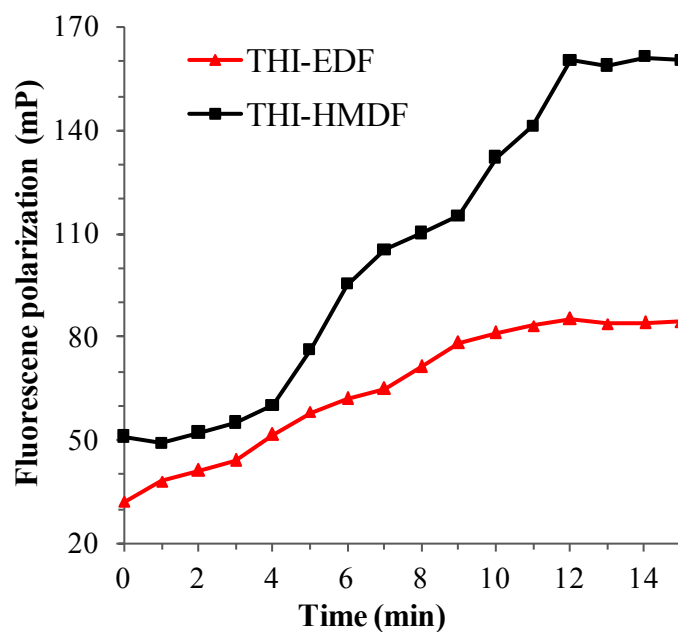

**Fig. S5** The binding kinetic curves of mAb C9 with fluorescent tracer-labeled haptens. One hundred milliliter THI-EDF and THI-HMDF (50-fold dilution) reacted with 100  $\mu\text{L}$  mAb C9 ( $300 \mu\text{g mL}^{-1}$ ) in black microtiter plate respectively. The value of FP was measured by SpectraMax M5 every minute with the 492 nm for excitation wavelength and 526 nm for emission wavelength. The interactions reached equilibrium after 12 min incubation.

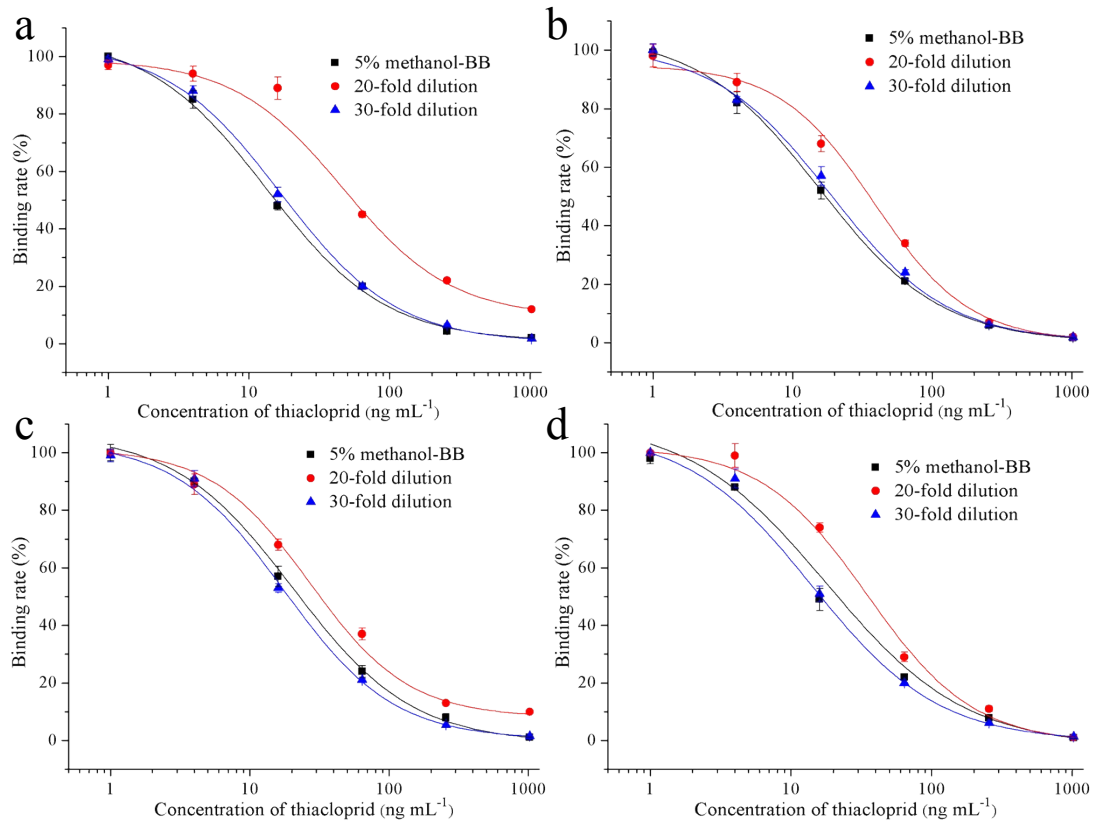

**Fig. S6** Matrix interference on FPIA. Standard inhibition curves for thiacloprid in the buffer, soil (a), rice (b), tomato (c), cucumber (d) matrices using the FPIA.
